# Supplementary material for: A COVID-19 vaccine candidate composed of the SARS-CoV-2 RBD dimer and Neisseria meningitidis outer membrane vesicles
Source: Royal Society of Chemistry journal article supplement (doi:10.1039/d1cb00200g), 2021-12-08
Supplement: d1cb00200g1.pdf [file d1cb00200g1.pdf]

## Electronic Supplementary Information

### A COVID-19 vaccine candidate composed of SARS-CoV-2 RBD dimer and *Neisseria meningitidis* outer membrane vesicles

Darielys Santana-Mederos,<sup>a,†</sup> Rocmira Perez-Nicado,<sup>a,†</sup> Yanet Climent,<sup>a,†</sup> Laura Rodriguez,<sup>a,†</sup> Belinda Sanchez Ramirez,<sup>b,†</sup> Sonia Perez-Rodriguez,<sup>c</sup> Meybi Rodriguez,<sup>a</sup> Claudia Labrada,<sup>a</sup> Tays Hernandez,<sup>b</sup> Marianniz Diaz,<sup>b</sup> Ivette Orosa,<sup>b</sup> Ubel Ramirez,<sup>a</sup> Reynaldo Oliva,<sup>a</sup> Raine Garrido,<sup>a</sup> Felix Cardoso,<sup>a</sup> Mario Landys,<sup>a</sup> Roselyn Martinez,<sup>a</sup> Humberto Gonzalez,<sup>a</sup> Tamara Hernandez,<sup>a</sup> Rolando Ochoa-Azze,<sup>a</sup> Jose L. Perez,<sup>a</sup> Juliet Enriquez,<sup>d</sup> Nivaldo Gonzalez,<sup>d</sup> Yenicet Infante,<sup>d</sup> Luis A. Espinosa,<sup>e</sup> Yassel Ramos,<sup>e</sup> Luis Javier González,<sup>e</sup> Carmen Valenzuela,<sup>f</sup> Ana Victoria Casadesus,<sup>b</sup> Briandy Fernandez,<sup>b</sup> Gertrudis Rojas,<sup>b</sup> Beatriz Pérez-Massón,<sup>b</sup> Yaima Tundidor,<sup>b</sup> Ernesto Bermudez,<sup>b</sup> Claudia A. Plasencia,<sup>b</sup> Tammy Boggiano,<sup>b</sup> Eduardo Ojito,<sup>b</sup> Fabrizio Chiodo,<sup>a,g</sup> Sonsire Fernandez,<sup>a</sup> Françoise Paquet,<sup>h</sup> Cheng Fang,<sup>i</sup> Guang-Wu Chen,<sup>j,†</sup> Daniel G. Rivera,<sup>k,†</sup> Yury Valdes-Balbin,<sup>a,†,\*</sup> Dagmar Garcia-Rivera<sup>a,†,\*</sup> and Vicente Verez Bencomo<sup>a,†,\*</sup>

<sup>a</sup>Finlay Vaccine Institute, 200 and 21 Street, Havana 11600, Cuba.

<sup>b</sup>Center of Molecular Immunology, P.O. Box 16040, 216 St. Havana, Cuba

<sup>c</sup>National Toxicology Center, Havana, 11500, Cuba

<sup>d</sup>National Civil Defense Research Laboratory, Mayabeque 32700, Cuba

<sup>e</sup>Center for Genetic Engineering and Biotechnology, Ave 31 e/ 158 y 190, Havana 10600, Cuba

<sup>f</sup>Institute of Cybernetics, Mathematics and Physics, Havana 10400, Cuba

<sup>g</sup>Department of Molecular Cell Biology and Immunology, Amsterdam UMC, Vrije Universiteit Amsterdam, Amsterdam, The Netherlands and Institute of Biomolecular Chemistry, National Research Council (CNR), Pozzuoli, Napoli, Italy

<sup>h</sup>Centre de Biophysique Moléculaire, CNRS UPR 4301, rue Charles Sadron, F-45071, Orléans, Cedex 2, France

<sup>i</sup>Shanghai Fenglin Glycodrug Promotion Center, Shanghai 200032, China

<sup>j</sup>Chengdu Olisynn Biotech. Co. Ltd., and State Key Laboratory of Biotherapy and Cancer Center, West China Hospital, Sichuan University, Chengdu 610041, People's Republic of China.

<sup>k</sup>Laboratory of Synthetic and Biomolecular Chemistry, Faculty of Chemistry, University of Havana, Zapata y G, Havana 10400, Cuba

<sup>†</sup>These authors contributed equally to this work. \*Corresponding authors: [dgr@fq.uh.cu](mailto:dgr@fq.uh.cu), [yvbalbin@finlay.edu.cu](mailto:yvbalbin@finlay.edu.cu), [dagarcia@finlay.edu.cu](mailto:dagarcia@finlay.edu.cu), [vicente.verez@finlay.edu.cu](mailto:vicente.verez@finlay.edu.cu)

## Materials and Methods

**HPLC, gel electrophoresis and structural representation.** Size-exclusion HPLC was performed in PBS pH 7 on a Superdex 75 Increase<sup>®</sup> 10/300 GL column and Superdex 200 Increase<sup>®</sup> 5/150 GL column (GE Healthcare) at a flow rate of 0.8 ml/min and 0.25 ml/min, respectively. SDS-polyacrylamide gel electrophoresis (SDS-PAGE) was performed in a gradient gel (4-20%) acrylamide, loading 5 µg of RBD dimer (RBD-d) and monomer (RBD-m). Gels were stained with Coomassie blue R250 and analyzed with Bio-Rad GS-800 densitometer and Quantity One software. The 3D structures of RBD-d were built by combining PDB 6M0J and PDB 6WPT to obtain the maximum amino acid coordinates for region Arg319-Phe541. The cryo-electron microscopy structure PDB 6WPT is obtained with *N*-glycans linked to Asn331 and Asn343. The structure of the RBD dimer resulted from a manual docking respecting the proximity of the two S-S linked Cys538s and its representation was obtained using the PyMOL molecular graphics system.<sup>1</sup>

### Production of recombinant RBD (319-541) dimer<sup>2</sup>

The coding sequence for RBD (Arg319-Phe541) with a hexahistidine tag at its C-terminus (Arg319-Phe541-(His)<sub>6</sub>) was optimized for mammalian cell expression in CHO (hamster, *Cricetulus griseus*), using the online gene optimization tools provided by Eurofins (Germany). The resulting nucleotide sequence was assembled and amplified by PCR using synthetic gene fragments (Eurofins, Germany) and oligonucleotides (Center for Genetic Engineering and Biotechnology, CIGB, Cuba) and cloned into an intermediate vector containing the CMV promoter and the mouse Ig VH signal gene. The expression cassette was re-cloned in the lentiviral

---

<sup>1</sup> De Lano W.L., Pymol. South San Francisco, CA: De Lano Scientific 2002.

<sup>2</sup> Y. Valdes-Balbin, *et al.* *ACS Chem. Biol.* 2021, **16**, 1223–1233.

vector pL6Wblast, kindly provided by CIGB. HEK-293T cells were co-transfected with the lentiviral vector containing the gene of interest plus the auxiliary plasmids pLPI, pLPII and pLP/VSV-G, to produce lentiviral particles. CHO-K1 host cells were transduced with lentiviral particles and grown in 96 well plates in the presence of the selection drug blasticidine. Supernatants were screened by ELISA for secreted RBD), and cells showing the highest secretion levels were adapted to grow in suspension in serum-free medium (a mixture of PFHMII with a Center of Molecular Immunology's proprietary medium). Secreted RBD was purified by immobilized metal affinity chromatography (IMAC) using Ni-NTA Sepharose to get a monomer/dimer mixture. The RBD dimer was then separated from the monomer and isolated as a single peak using a Superdex 200 column (Fig. S2).

**Mass Spectrometry analysis.** The purified dimer (RBD-d, 5  $\mu$ g) was treated with *N*-ethyl maleimide (NEM), deglycosylated with PNGase-F to remove N-glycans, and desalted (ZipTips C18, Millipore). The desalted protein was loaded into the metal-coated nanocapillary for ESI-MS analysis. *N*-deglycosylated RBD-d and its tryptic peptides were analyzed in a hybrid orthogonal QToF-2<sup>TM</sup> tandem mass spectrometer (Micromass) for ESI-MS analysis. The desalted samples were loaded into the metal-coated nanocapillary and sprayed into the ion source using 1200 and 35 volts for the capillary and the entrance cone, respectively. The multiply-charged ESI-MS spectrum ( $m/z$  400-3000) of *N*-deglycosylated RBD was deconvoluted (mass 3000-70000) with MaxtEnt 1.0 software. The ESI-MS of tryptic peptides were acquired ( $m/z$  200-2000). To obtain structural information in the MS/MS spectra, the multiply-charged ions were manually fragmented by collision-induced dissociation using collision energies (20-50 eV). Argon was used as collision gas. The ESI-MS/MS of tryptic peptides with  $z \geq 3+$  were deconvoluted using the MaxEnt 3.0 software. The multiply-charged ESI-MS spectrum ( $m/z$  400-3000) of *N*-deglycosylated RBD was

deconvoluted (mass 3000-70000) with MaxtEnt1.0 software. Theoretical  $m/z$  values for tryptic peptides and for the intact protein were calculated using the MassLynx v4.1 software (Micromass).

### **ESI-MS analysis of RBD dimer**

The ESI-MS spectrum showed multiply-charged ions, indicating certain heterogeneity due to the *O*-glycan chains linked to the *N*-deglycosylated RBD dimer (Fig. S3A). Deconvoluted ESI-MS spectrum showed (Fig. S3B) three major signals, differing in +291 Da (matching the mass value for sialic acid residue and indicating a variable number of sialic acids residues in the RBD dimer). The lowest abundant signal corresponds to the RBD dimer linked to two *O*-glycan chains (HexNAc-Hex-SA), shown in Fig. S3B as OG1. The signal with an intermediate abundance (Fig. S3B) corresponds to the dimer linked to a mixture of two *O*-glycans OG1 (HexNAc-Hex-SA) and OG2 (HexNAc-Hex-SA<sub>2</sub>). The most intense signal corresponds to the RBD dimer linked to two OG2 (HexNAc-Hex-SA<sub>2</sub>) (Fig. S3B).

Table S1 summarizes the structural assignments for all signals corresponding to the *O*-glycoforms present in the dimer. The assignment for all tryptic peptides is summarized in Table S2. Signals corresponding to the four intramolecular disulfide bonds in RBD dimer, and the *N*-terminal peptides (R319-R328 and V320-R328) *O*-glycosylated at Thr323/Ser325 residues were identified. The dimeric nature of the RBD was confirmed by signals corresponding to peptide [C538-H547]-S-S-[C538-H547] ( $m/z$  Exp. 522.02 (5+) and  $m/z$  Exp 652.28 (4+), Fig. S3).

### **Dynamic Light Scattering (DLS)**

DLS measurements were performed with a Malvern Zetasizer Nano ZS (Malvern) equipped with a 633 nm He-Ne laser and operating at an angle of 173°. Scattering light detected at 173° was automatically adjusted by laser attenuation filters. For data analysis, the viscosity and refractive index (RI) of PBS buffer solution (at 25 °C) were used. The software used to collect and analyze

the data was the Zetasizer software version 7.11. The temperature was set at 25 °C. Each sample at 500 µg/mL protein content was characterized in a single-use polystyrene microcuvette (ZEN0040, Alfatest). The size was reported as the hydrodynamic diameter (intensity graph) of three measurements, providing also a polydispersity index (PdI) of the size values calculated.

**Recognition of recombinant human ACE2 by RBD-d.** Microtiter plates (High binding, Costar) were coated with ACE2-mFc (50 µL/well, 5 µg/mL) in 0.1 M carbonate-bicarbonate buffer pH 9.6 and incubated overnight at 4 °C. Plates were blocked with 200µL/well of 2% Non Fat Dry Milk (NFDM) in PBS-0.05% Tween 20 (PBST) for 1 h at 37 °C. Serial dilutions of the RBD-d in 0.2% NFDM/PBST 50 µL were added and incubated for 2 h at 37 °C. RBD and 6×His tagged PD-L1 were used as the positive and negative control, respectively. The bound protein was detected with RBD-specific rabbit polyclonal antibodies (PAbs, 50 µL/well, 100 µg/mL) for 1 h at 37 °C. Next, a peroxidase-conjugated anti-rabbit IgG monoclonal antibody (MAb, 50 µL/well, 1:10000) was added and the plates were incubated for 1 h at 37 °C. The reaction was visualized by addition of 3,3',5,5'-Tetramethylbenzidine (TMB) (BDBiosciences) and stopped with 1 M H<sub>2</sub>SO<sub>4</sub>. The absorbance at 450nm was measured using a microwell system reader (Organon Teknica). All incubations were followed by three washing steps with PBS-T.

**Reactivity cell-based ELISA.** 40000 Vero cells were seeded in 96-well cell culture plates. 48 h after seeding, the cells were fixed by adding 100 µL of 4% paraformaldehyde (PFA) followed by incubation at room temperature for 20 min and quenching for 5 min at room temperature with 50 µL of 0.3% H<sub>2</sub>O<sub>2</sub>, in PBS. The cells were blocked with 200 µL/well of assay buffer (3% of bovine serum albumin (BSA) in PBS) for 1 h at room temperature. Next, 50 µL of the RBD-d and RBD-hFc were added at different concentrations and incubated for 2 h at room temperature. RBD-d, RBD-m and RBD-hFc binding was revealed with 100 µL of RBD specific MAb S1 (10

$\mu\text{g/mL}$  in assay buffer) for 1 h at room temperature. Next, 100  $\mu\text{L}$ /well of Biotin-SP-AffiniPure F(ab')<sub>2</sub> Fragment Goat Anti-Mouse IgG (1:5000 in assay buffer; Jackson, 115-066-071) was added and incubated for 1 h at room temperature, followed by the addition of 100  $\mu\text{L}$  of streptavidin-conjugated peroxidase (Sigma, S5512) during 30 min at room temperature (1:25000 in assay buffer). Finally, the 3,3',5,5'-tetramethylbenzidine (TMB) peroxidase substrate (Sigma, T0440) was added and plates were light-protection incubated for 15 min at room temperature. The reaction was stopped using 1 M  $\text{H}_2\text{SO}_4$ . The OD at 450 nm was measured using a microwell reader (BioTek). All incubations were followed by three washing steps with PBS.

### **Animal experiments**

Immunogenicity of the RBD-d/OMV/alum and RBD-d/alum was evaluated in BALB/c mice (age: 6-8 weeks, 15-20 g), supplied by the National Center for Laboratory Animals Breeding (CENPALAB), Havana, Cuba. All protocols were performed in accordance with the Guidelines for Care and Use of Laboratory Animals of the Finlay Vaccine Institute and approved by its Animal Ethics Committee.

**Immunization schedule and sera samples.** Intramuscular injection on days 0, 14 and 28; sera were collected at days 0 (before immunization) and at days 7, 14, 21, 28, 35 and 42. Immunogenicity experiments included groups of 10 mice injected with: a) 10  $\mu\text{g}$  of RBD-d and 4  $\mu\text{g}$  of OMV adjuvated with 250  $\mu\text{g}$  of  $\text{Al}(\text{OH})_3$ , b) 10  $\mu\text{g}$  of RBD-d adjuvated with 250  $\mu\text{g}$  of  $\text{Al}(\text{OH})_3$  and c) 250  $\mu\text{g}$  of  $\text{Al}(\text{OH})_3$  as control.

### **Anti-RBD IgG ELISA**

ELISA plates (96 well, NUNC) were coated with 50  $\mu\text{L}$  of RBD-d at 10  $\mu\text{g}\cdot\text{mL}^{-1}$  in carbonate-bicarbonate buffer pH 9.6 overnight at 4 °C. Plates were blocked in 5% skim milk-PBS for 1 h at 37 °C. Serum samples (diluted 1:3 *v/v* in PBS-1% BSA solution, pH 7.2) were added in serial

dilution starting from 1/50 and were then incubated for 1 h at 37 °C. Goat anti-mouse IgG-HRP antibody (Sigma A4416) diluted 1/5000 in PBS-1% BSA pH 7.2 were added and incubated for 1 h at 37 °C. Then, TMB peroxidase substrate was added to the plates and incubated for 20 minutes. Reactions were stopped with 2 N H<sub>2</sub>SO<sub>4</sub> and the absorbance was measured at 450 nm in a microplate reader ELISA Multiskan EX (ThermoScientific). ). All incubations were followed by three washing steps with PBS-T. The endpoint titer was defined as the highest reciprocal dilution of serum that gives an absorbance 4-fold greater than pre-immune serum diluted 1/50.

### **Avidity ELISA**

To assess avidity, the method described by Antilla et al.<sup>3</sup> was followed, based on the dissociation of the antigen-antibody interaction by treatment with the chaotropic agent ammonium thiocyanate (NH<sub>4</sub>SCN). The plates were covered and blocked under the same conditions as in anti-RBD IgG ELISA, and later the sera were added in the dilution whose absorbance value was ~1 in the titration ELISA, and incubated at 37 °C for 1 h. A fixed concentration of 2 mol.L<sup>-1</sup> NH<sub>4</sub>SCN was added and incubated for 15 minutes at room temperature, followed by repetition of the ELISA procedure previously described. The Avidity Index (AI) indicates the percentage of IgG antibodies that remain bound to the antigen after treatment with the chaotropic agent and is calculated by the formula (IgG titer with NH<sub>4</sub>SCN/IgG titer without NH<sub>4</sub>SCN)\*100. Antibodies with good avidity are considered those with an AI greater than 50%. AI was determined only for the responding animals (titer log > 1.70) by the anti-RBD IgG ELISA.

---

<sup>3</sup> Antilla M., Eskola J., Ahman H. Avidity of IgG for Streptococcus Pneumoniae type 6B and 23F polysaccharide in infants primed with pneumococcal conjugate and boosted with polysaccharide or conjugate vaccines. *J. Infectious Diseases* 1998, **177**, 1614-1621.



### **Quantification of anti-RBD IgG1 and IgG2a in immunized mice**

The tests were carried out following the same steps as in the anti-RBD IgG ELISA, except that after adding the sera and washing, the anti-IgG1 and anti-IgG2a biotin-conjugates (dilution 1:10000 and 1:5000, respectively) were added following by incubation for 1 hour at 37 °C. After another washing step, streptavidin peroxidase conjugate is added and the mixture is incubated for 1 hour at 37 °C. The rest of the steps and the analysis of the results were carried out according to the anti-RBD IgG ELISA to determine the antibody titers. After determining the IgG1 and IgG2a titers, the ratio IgG2a/IgG1 is calculated using the formula titer of IgG2a/titer of IgG1. This relationship shows where the cellular response pattern is directed (i.e., Th1 or Th2).

### **Quantification of cytokines IFN- $\gamma$ and IL-4**

Splenocytes from immunized mice were isolated and culture in RPMI 1640 (Gibco) supplied with 10% (v/v) FBS (Hyclone), 100 U/mL penicillin, 100  $\mu$ g/ml streptomycin, 1 mM pyruvate, 50  $\mu$ M  $\beta$ -mercaptoethanol (all from Sigma-Aldrich). These cells ( $3 \times 10^6$  per well) were incubated for 72 h with RBD-d (5  $\mu$ g.mL<sup>-1</sup>), concanavalin A (5  $\mu$ g.mL<sup>-1</sup>) as positive control and medium alone as negative control. Supernatants were collected and stored at -80 °C. IFN- $\gamma$  and IL-4 levels were quantified using an ELISA kit (Mabtech) following the manufacturer's instructions.

### **Adoptive cell transfer**

Splenic lymphocytes from immunized mice (donor) were transferred to naïve ones (recipient) as previously described.<sup>2</sup> Anti-RBD IgG levels were determined by the ELISA assay previously described.

### **Molecular Virus Neutralization Assay**

The ability of anti-RBD specific antibodies to inhibit the RBD-ACE2 interaction was evaluated in a Molecular Virus Neutralization Assay. Briefly, microtiter plates (High binding, Costar) were coated with 250 ng/well of ACE2-mFc in 0.1 M carbonate-bicarbonate buffer pH 9.6 and incubated overnight at 4 °C. Plates were blocked with 200 µL/well of 2% of skim milk in PBS-T during 1 h at 37 °C. Serial dilutions of sera were pre-incubated with RBD-Fc (final conc. 20 ng.mL<sup>-1</sup>) for 1 h at 37 °C. RBD-mFc was used for human samples and RBD-hFc was used for animal samples. Mixtures were added to the plates and incubated for 2 h at 37 °C. The binding of RBD-mFc was detected by addition of alkaline phosphatase (AP) conjugated anti-mouse IgG antibody (1:1000) (Sigma, A9316) for 1 h at 37°C. RBD-Fc recombinant proteins, sera and antibody conjugates were diluted in 0.2% of skim milk in PBST. In the case of RBD-hFc, the binding was detected by incubating with anti-human IgG antibody conjugated AP (1:1800) (Sigma, A3188). Finally, *p*-nitrophenylphosphate (Sigma N9389) at 1 mg.mL<sup>-1</sup> in diethanolamine buffer pH 9.8 was added, and plates were incubated at room temperature for 30 min. Absorbance at 405nm was measured using a microwell reader (BioTek). In all steps other than blockade, samples and reagents were added to get a final volume of 50 µL/well. Three washing steps with PBST followed all incubations. Inhibition was calculated and expressed as percent according to the next formula: Inhibition (%)= [1-(OD405nmsample/OD405nm maximal recognition)]×100. Maximal recognition corresponds to wells incubated only with RBD-mFc or RBD-hFc (20 ng.mL<sup>-1</sup>). To determine ID<sub>50</sub>, dilutions were log transformed and data were adjusted to a log(inhibitor) vs normalized response with variable slope non-linear regression.

### **Virus neutralization assay**

The virus neutralization assay was performed following the recommendation of Manenti *et al.*<sup>4</sup> with few modifications. Animal serum samples were heat-inactivated for 30 minutes at 56 °C. Two-fold serial dilutions of each sample serum (starting in 1:10 until 1:2560) were then mixed with an equal volume of viral suspension containing 100 median tissue culture infectious dose (TCID<sub>50</sub>) of SARS-CoV-2 (Strain 2025, Cuban Collection, National Laboratory of Civil Defense, Biosafety Laboratory Level 3 facility) and incubated for 1 h at 37 °C in a humidified atmosphere with 5% CO<sub>2</sub>. After incubation, 100 µL of each dilution was added in duplicate to plates containing a semiconfluent VERO E6 monolayer (10<sup>4</sup> cell/well). The plates were incubated for 3 days at 37 °C in a humidified atmosphere with 5% CO<sub>2</sub>. Then, the supernatant was carefully discarded and 100 µL/well of a sterile PBS solution containing 0.02% neutral red (Sigma) was added. After 1 h of incubation at room temperature, the neutral red solution was discarded and the cell monolayer was washed twice with sterile PBS-T. After the second incubation, PBS-T was carefully removed; then 100 µL/well of a lysis solution (50 parts of absolute ethanol (Sigma), 49 parts of MilliQ water and 1 part of glacial acetic acid (Sigma) were added. Plates were incubated for 15 min at room temperature and then read at 540 nm in a spectrophotometer. The viral neutralizing titer 50 (VNT<sub>50</sub>) is the highest serum dilution giving 50% of the average DO with respect to control cell wells (VERO E6 monolayer without mixture of virus-sera). In sera where VNT<sub>50</sub> could not be calculated until 1:2560 dilution, the assay was repeated starting with a higher dilution.

### **Expression of phage-displayed RBDs**

---

<sup>4</sup> Manenti, A., Maggetti, M., Casa, E., Martinuzzi, D., Torelli, A., Trombetta, C. M., Marchi, S., Montomoli, E. (2020) Evaluation of SARS-CoV-2 neutralizing antibodies using a CPE-based colorimetric live virus micro-neutralization assay in human serum samples. *J. Med. Virol.* 92, 2096-2104.

The RBD coding sequence Arg328-Thr533 (Eurofins<sup>TM</sup>, Germany) was cloned in the phagemid vector pCSM through ApaLI and NotI restriction sites.<sup>5</sup> The original gene was modified by site-directed mutagenesis to introduce the triplets coding for the desired replacements in RBD sequence. Phages displaying wild-type RBD and its mutants were rescued with M13KO7 helper phage as described.<sup>4</sup> The three RBDs expressed with a single mutation were N501Y, L452R and E484K, and the triple RBD mutant included mutations N501Y+ E484K+K417N, corresponding to the variant of concern beta. Display levels were determined by ELISA on microplates coated with 9E10 mAb, an antibody targeting the c-myc tag fused to the carboxyl-terminal end of all proteins displayed in this system. Phages displaying the original wild-type RBD were used as reference, assuming a display level of 100 units/mL for them, whereas relative levels of mutated variants were subsequently calculated as reported.<sup>6</sup> Phage-displayed RBD was shown to be biologically active by ELISA on microplates coated with the recombinant extracellular region of human ACE2 receptor fused to human Fc (ACE2-hFc), which confirmed their proper folding on the viral particles assembled in *E. coli* periplasm.

### **Molecular Virus Neutralization Assay with phage-displayed RBDs**

To assess the inhibition of RBD-ACE2 interaction by sera of vaccinated individuals, polyvinyl chloride microplates were coated with ACE2-hFc at 5  $\mu\text{g}\cdot\text{mL}^{-1}$  in phosphate-buffered saline (PBS) overnight at 4 °C and blocked with PBS containing 4% skim milk powder (M-PBS) during 1h at room temperature. Each phage preparation was diluted at 0.075 display units/mL in M-PBS containing serial dilutions of sera (from 1/25 to 1/25 600). Phages similarly diluted in M-PBS

---

<sup>5</sup> Rojas, G. Fine epitope mapping based on phage display and extensive mutagenesis of the target antigen. *Methods Mol. Biol.* **2014**, 1131, 447-476.

<sup>6</sup> Rojas, G., Carmenate, T. Phagekines: screening binding properties and biological activity of functional cytokines displayed on phages. *Methods Mol. Biol.* **2018**, 1701, 535-560.

alone were used as controls for maximum binding (100%). After 1h of pre-incubation at room temperature, diluted phages were incubated on coated/blocked microplates during an additional hour. Plates were washed with PBS containing 0.1% Tween 20 (PBS-T) and incubated 1h at room temperature with an anti-M13 mAb conjugated to horseradish peroxidase (GE Healthcare, USA), properly diluted in M-PBS. After washing, the substrate ortho-phenylenediamine ( $500 \mu\text{g}\cdot\text{mL}^{-1}$ ) and 0.015 % hydrogen peroxide in citrate-phosphate buffer  $0.1 \text{ mol}\cdot\text{L}^{-1}$ , pH 5.0, were added. The reaction was stopped 15 min later, with  $2.5 \text{ mol}\cdot\text{L}^{-1}$  sulfuric acid. Absorbance at 490 nm was determined with a microplate reader. Relative binding levels at each point of serum inhibition were calculated as the ratio between absorbance at 490 nm and the maximum binding signal of the same phage-displayed RBD variant in M-PBS. Sigmoidal inhibition curves were analyzed with GraphPad Prism 5 software, and serum dilutions producing 50% binding inhibition ( $\text{ID}_{50}$ ) were calculated for each serum sample against each phage-displayed RBD mutant.

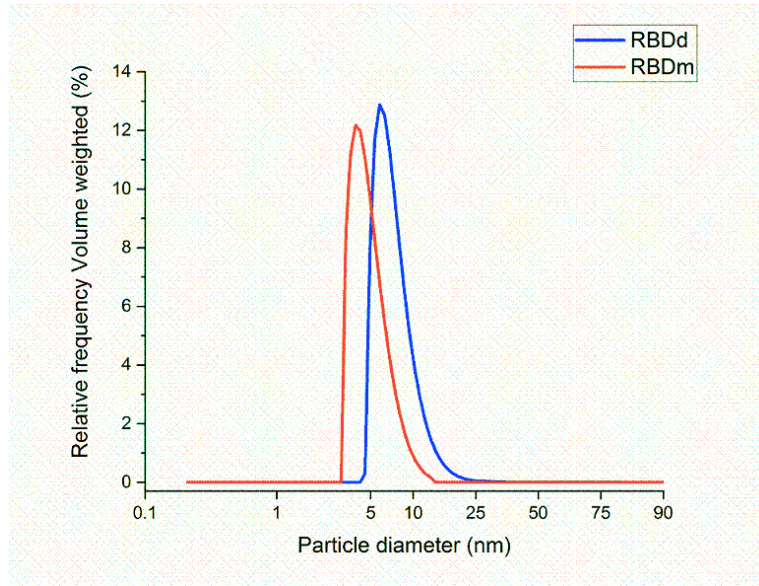

**Fig S1.** Characterization of the RBD dimer (blue) and RBD monomer (red) by dynamic light scattering.

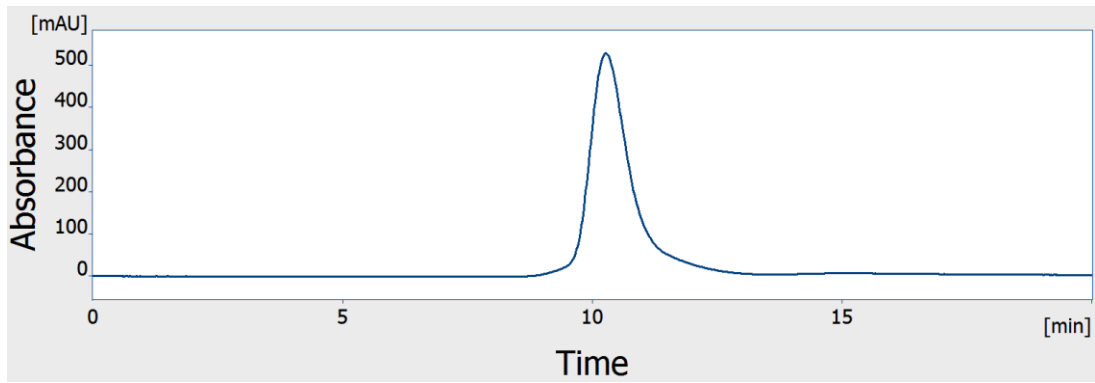

**Fig. S2.** SE-HPLC chromatogram of purified RBD dimer.

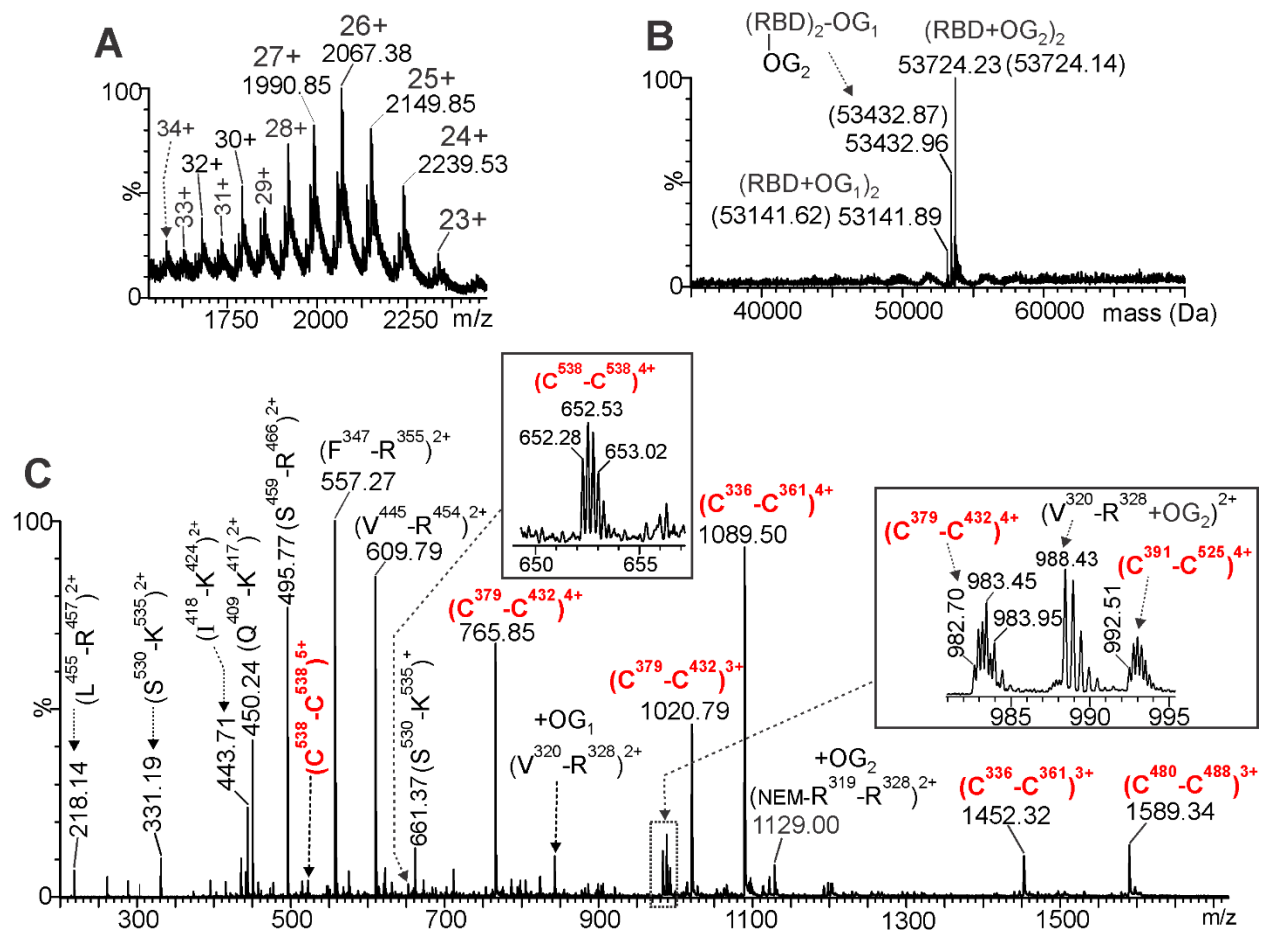

**Figure S3.** Multiply-charged (A) and deconvoluted (B) ESI-MS spectra of N-deglycosylated RBD dimer. In (B), the expected molecular masses consider the conversion of Asn331 and Asn343 into Asp by PNGase F, *O*-glycosylation, four intramolecular disulfide bonds and one intermolecular disulfide bond between Cys538 in each RBD unit. The signals corresponding to the disulfide bonds are labeled red. OG1 and OG2 represent the *O*-glycosylation with HexNAc-Hex-SA and HexNAc-Hex-SA2, respectively. HexNAc: N-acetyl hexosamine, Hex: hexose, SA: sialic acid. (C) ESI-MS spectrum of the proteolytic peptides derived from RBD dimer treated with N-ethylmaleimide (NEM), deglycosylated with PNGase F and digested with trypsin following the in-solution buffer-free digestion protocol.<sup>7</sup>

<sup>7</sup> Betancourt, L. H., Espinosa, L. A., Ramos, Y., Bequet-Romero, M., Rodríguez, E. N., Sánchez, A., Marko-Varga, G., González, L. J., Besada, V. (2020) Targeting hydrophilic regions of recombinant proteins by MS using in-solution buffer-free trypsin digestion. *Eur. J. Mass Spectrometry* 26, 230-237.

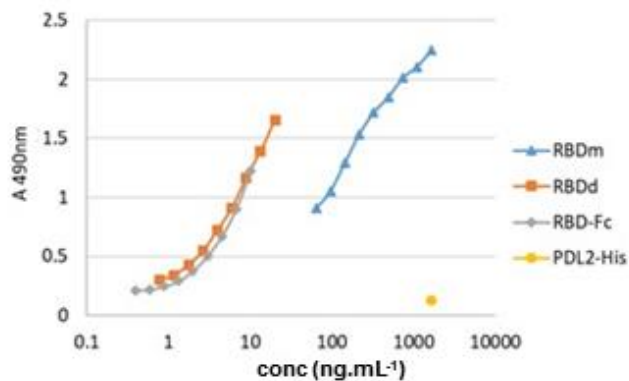

**Figure S4.** Interaction of RBD monomer, RBD dimer, RBD-Fc and a negative control with the recombinant hACE2-Fc receptor.

**Table S1.** Summary of the average molecular weight (M.W) by ESI-MS of the RBD dimer previously N-deglycosylated with PNGase F.

| Average M.W Theor (Da) + 4 S-S + C <sup>538</sup> -C <sup>538</sup> + PNGase F (N <sup>331</sup> , N <sup>343</sup> →D) | Modification <sup>(a)</sup>                         | Average M.W Theor (Da) | Average M.W Exp (Da) | Error (%) <sup>(b)</sup> | Assignment                   |
|-------------------------------------------------------------------------------------------------------------------------|-----------------------------------------------------|------------------------|----------------------|--------------------------|------------------------------|
| 51828.43                                                                                                                | + (O-HexNAc-Hex-SA) <sub>2</sub>                    | 53141.62               | 53141.89             | 0.003                    | Dimmer of O-glycosylated RBD |
|                                                                                                                         | + O-HexNAc-Hex-SA<br>+ O-HexNAc-Hex-SA <sub>2</sub> | 53432.87               | 53432.96             | 0.0002                   |                              |
|                                                                                                                         | + (O-HexNAc-Hex-SA <sub>2</sub> ) <sub>2</sub>      | 53724.14               | 53724.23             | 0.0002                   |                              |

(a) HexNAc: N-acetyl hexosamine, Hex: hexose, SA: sialic acid, four intramolecular disulfide bonds and one intermolecular disulfide bond between the two Cys538 of each monomer.

(b) Relative error (%) = |(M.W theor – M.W exp) / M.W theor| \* 100.



**Table S2.** Assignment for the tryptic digest of the RBD dimer generated by using an in-solution buffer-free digestion protocol and analyzed by ESI-MS.

| Sequence assignment <sup>a)</sup>                                                               | <i>m/z</i> Exp | <i>m/z</i> Theor | <i>z</i> |
|-------------------------------------------------------------------------------------------------|----------------|------------------|----------|
| <sup>319</sup> RVQPTESIVR <sup>328</sup> +HexNAc+Hex+SA (O-glycosylation)                       | 920.93         | 920.96           | 2+       |
|                                                                                                 | 614.30         | 614.31           | 3+       |
| <sup>319</sup> RVQPTESIVR <sup>328</sup> +HexNAc+Hex+SA <sub>2</sub> (O-glycosylation)          | 1066.50        | 1066.50          | 2+       |
|                                                                                                 | 711.33         | 711.34           | 3+       |
| NEM- <sup>319</sup> RVQPTESIVR <sup>328</sup> +HexNAc+Hex+SA (O-glycosylation)                  | 983.45         | 983.48           | 2+       |
| NEM- <sup>319</sup> RVQPTESIVR <sup>328</sup> +HexNAc+Hex+SA <sub>2</sub> (O-glycosylation)     | 1129.00        | 1129.03          | 2+       |
| <sup>320</sup> VQPTESIVR <sup>328</sup>                                                         | 514.78         | 514.79           | 2+       |
| <sup>320</sup> VQPTESIVR <sup>328</sup> +HexNAc+Hex+SA (O-glycosylation)                        | 842.89         | 842.90           | 2+       |
| <sup>320</sup> VQPTESIVR <sup>328</sup> +HexNAc+Hex+SA <sub>2</sub> (O-glycosylation)           | 988.43         | 988.45           | 2+       |
| <sup>329</sup> FPDITNLCPFGEVFDATR <sup>346</sup>                                                | 1089.50        | 1089.51          | 4+       |
| <br><sup>358</sup> ISNCVADYSVLYNSASFSTFK <sup>378</sup> (C <sup>336</sup> -C <sup>361</sup> )   | 1452.32        | 1452.35          | 3+       |
| <sup>347</sup> FASVYAWNR <sup>355</sup>                                                         | 557.27         | 557.28           | 2+       |
|                                                                                                 | 1113.51        | 1113.55          | 1+       |
| <sup>356</sup> KR <sup>357</sup>                                                                | 303.21         | 303.21           | 1+       |
| <br><sup>379</sup> CYGVSPTK <sup>386</sup>                                                      | 765.85         | 765.86           | 4+       |
| <sup>425</sup> LPDDFTGCVIAWNSNNLDSK <sup>444</sup> (C <sup>379</sup> -C <sup>432</sup> )        | 1020.79        | 1020.81          | 3+       |
|                                                                                                 | 1530.67        | 1530.71          | 2+       |
| <br><sup>379</sup> CYGVSPTK <sup>386</sup>                                                      | 982.70         | 982.71           | 4+       |
| <sup>418</sup> IADYNYKLPDDFTGCVIAWNSNNLDSK <sup>444</sup> (C <sup>379</sup> -C <sup>432</sup> ) | 786.37         | 786.37           | 5+       |
| <br><sup>387</sup> LNDLCFTNVYADSFVIR <sup>403</sup>                                             | 1323.00        | 1323.02          | 3+       |
| <sup>510</sup> VVVLSEFLLHAPATVCGPK <sup>528</sup> (C <sup>391</sup> -C <sup>525</sup> )         | 992.51         | 992.52           | 4+       |
| <sup>404</sup> GDEVR <sup>408</sup>                                                             | 575.26         | 575.28           | 1+       |
|                                                                                                 | 288.14         | 288.14           | 2+       |
| <sup>409</sup> QIAPGQTGK <sup>417</sup>                                                         | 450.24         | 450.25           | 2+       |
|                                                                                                 | 899.45         | 899.50           | 1+       |
| <sup>418</sup> IADYNYK <sup>424</sup>                                                           | 443.71         | 443.72           | 2+       |
|                                                                                                 | 886.40         | 886.43           | 1+       |
| <sup>445</sup> VGGNYNYLYR <sup>454</sup>                                                        | 609.79         | 609.80           | 2+       |
|                                                                                                 | 1218.56        | 1218.59          | 1+       |
| <sup>455</sup> LFR <sup>457</sup>                                                               | 435.26         | 435.27           | 1+       |
|                                                                                                 | 218.14         | 218.14           | 2+       |
| <sup>455</sup> LFRK <sup>458</sup>                                                              | 282.18         | 282.19           | 2+       |
| <sup>458</sup> KSNLKPFR <sup>466</sup>                                                          | 373.55         | 373.55           | 3+       |
| <sup>459</sup> SNLKPFR <sup>466</sup>                                                           | 495.77         | 495.77           | 2+       |
| <sup>467</sup> DISTEIQAGSTPCNGVEGFNCYFPLQSYGFQPTNGVGY                                           | 1589.34        | 1589.38          | 3+       |
| QPYR <sup>509</sup>                       (C <sup>480</sup> -C <sup>488</sup> )                 | 1192.29        | 1192.29          | 4+       |
| <sup>529</sup> KSTNLVK <sup>535</sup>                                                           | 395.24         | 395.25           | 2+       |
| <sup>530</sup> STNLVK <sup>535</sup>                                                            | 661.37         | 661.39           | 1+       |

|                                                                                                    |        |        |    |
|----------------------------------------------------------------------------------------------------|--------|--------|----|
|                                                                                                    | 331.19 | 331.20 | 2+ |
| <sup>536</sup> NK <sup>537</sup>                                                                   | 261.15 | 261.16 | 1+ |
| <sup>538</sup> CVNF <sup>541</sup> - <i>HHHHHH</i>                                                 | 652.28 | 652.28 | 4+ |
| <sup>538</sup> CVNF <sup>541</sup> - <i>HHHHHH</i> (Homodimer C <sup>538</sup> -C <sup>538</sup> ) | 522.02 | 522.03 | 5+ |

(a) HexNAc: N-acetyl hexosamine, Hex: hexose, SA: sialic acid, NEM: N-ethylmaleimide.
